# Supplementary material for: New accurate diabatic potential energy surfaces for the two lowest 1A′′ states of H2S and photodissociation dynamics in its first absorption band
Source: Royal Society of Chemistry journal article supplement (doi:10.1039/d3cp03026a), 2023-01-01
Supplement: d3cp03026a1.pdf [file d3cp03026a1.pdf]

Supporting Information

for

**New accurate diabatic potential energy surfaces for the lowest two  
 $^1A''$  states of H<sub>2</sub>S and photodissociation dynamics in its first  
absorption band**

Junjie Chen,<sup>1</sup> Hanzi Zhang,<sup>1</sup> Linsen Zhou,<sup>2,\*</sup> Xixi Hu,<sup>3,4,\*</sup> and Daiqian Xie<sup>1,4</sup>

*<sup>1</sup>Institute of Theoretical and Computational Chemistry, Key Laboratory of  
Mesoscopic Chemistry, School of Chemistry and Chemical Engineering, Nanjing  
University, Nanjing 210023, China*

*<sup>2</sup>Institute of Materials, China Academy of Engineering Physics, Mianyang 621907, China.*

*<sup>3</sup>Kuang Yaming Honors School, Institute for Brain Sciences, Nanjing University,  
Nanjing 210023, China*

*<sup>4</sup>Hefei National Laboratory, Hefei 230088, China*

\*: Corresponding authors, [zhoulinsen173@aliyun.com](mailto:zhoulinsen173@aliyun.com) (L.Z.), [xxhu@nju.edu.cn](mailto:xxhu@nju.edu.cn) (X.H.)

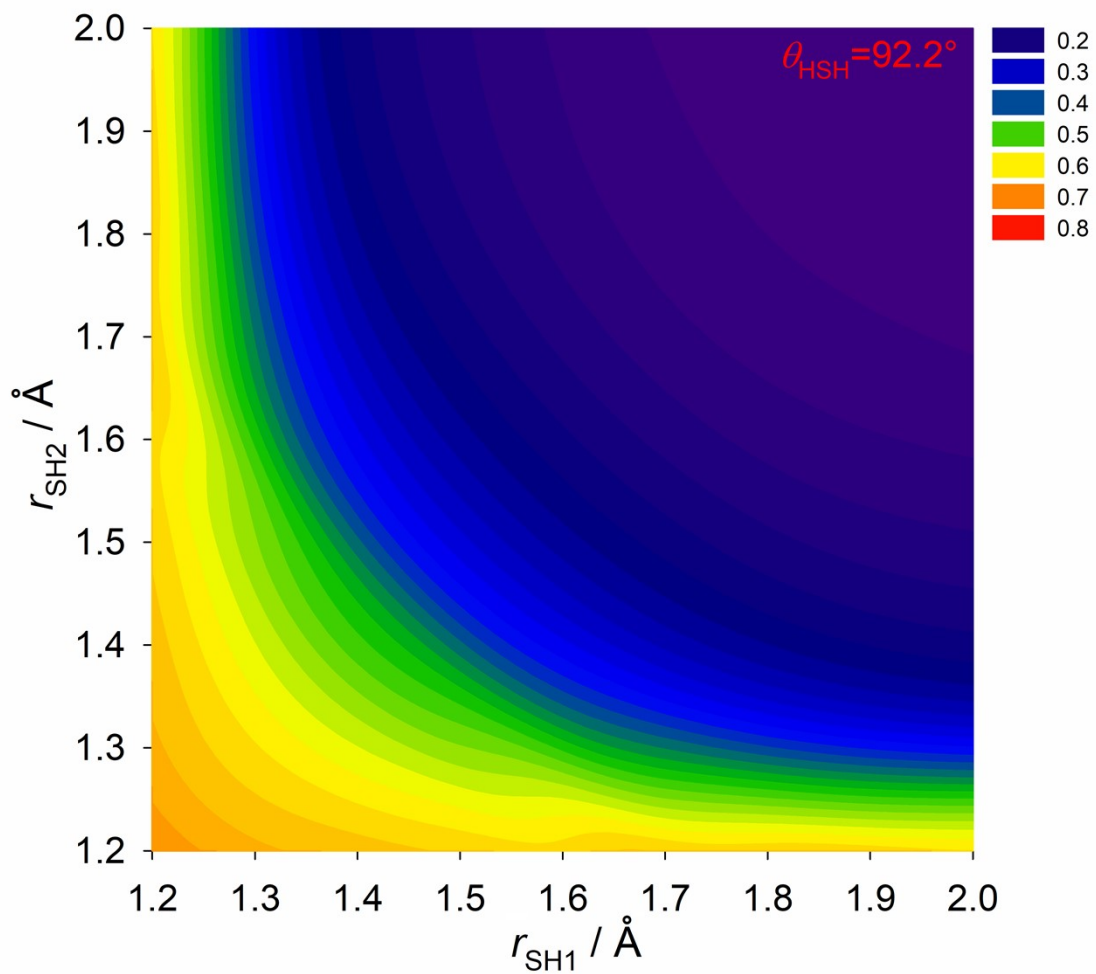

Fig. S1 Diabatic transition dipole surface ( $\mu dB$ ) for the  $1^1B_1 \leftarrow \tilde{X}^1A_1$  transition as a function of two bond S-H lengths with the inter-bond angle  $\theta_{\text{HSH}}$  fixed at  $92.2^\circ$ . The contour interval is 0.1 a.u.

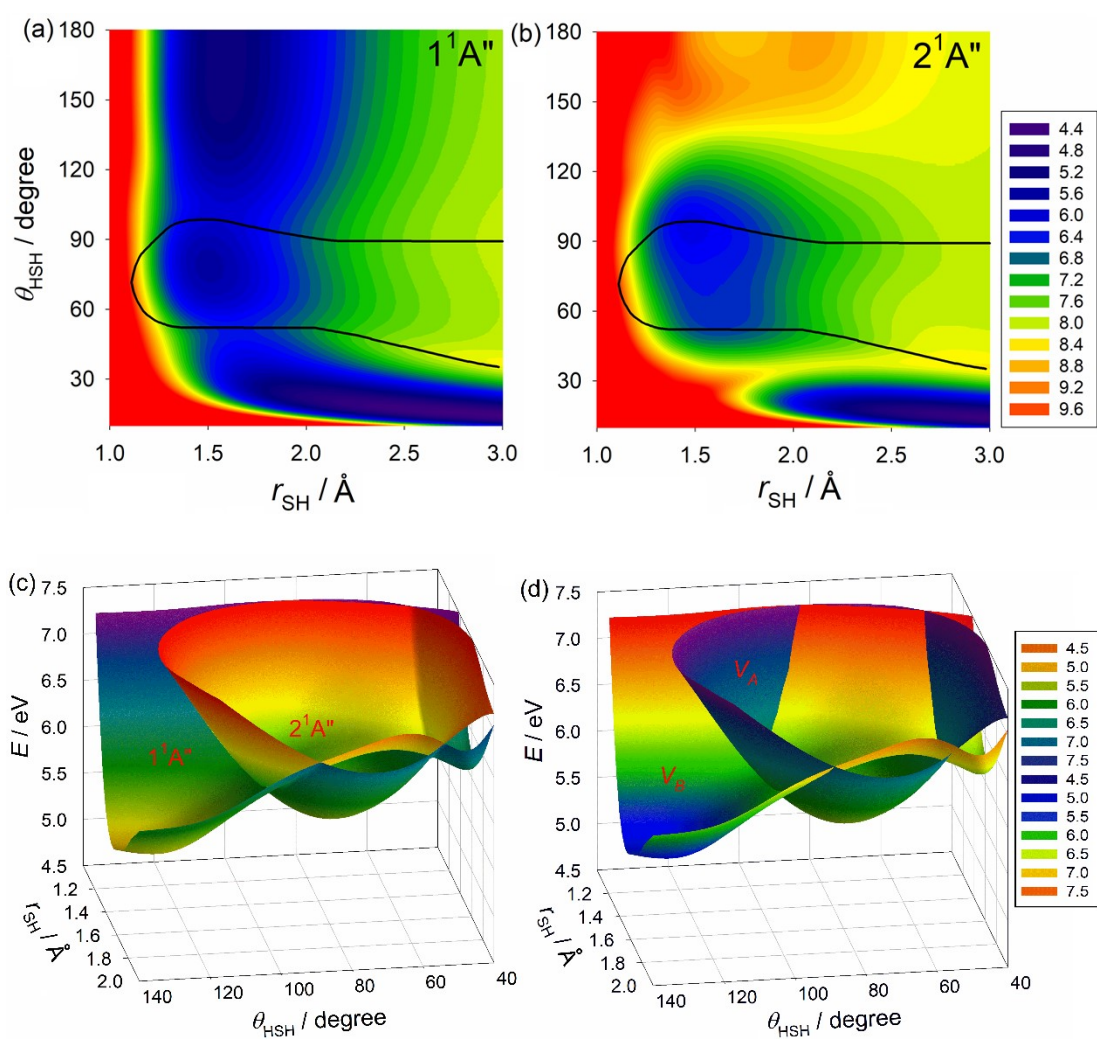

Fig. S2 Contour plots of adiabatic PESs for the singlet (a)  $1^1A''$  and (b)  $2^1A''$  states, 3D plots for the adiabatic PESs (c) and diagonal diabatic PESs (d) as a function of equivalent S-H bond lengths and inter-bond angle. The CI seam between the two PESs is shown by a solid black line.

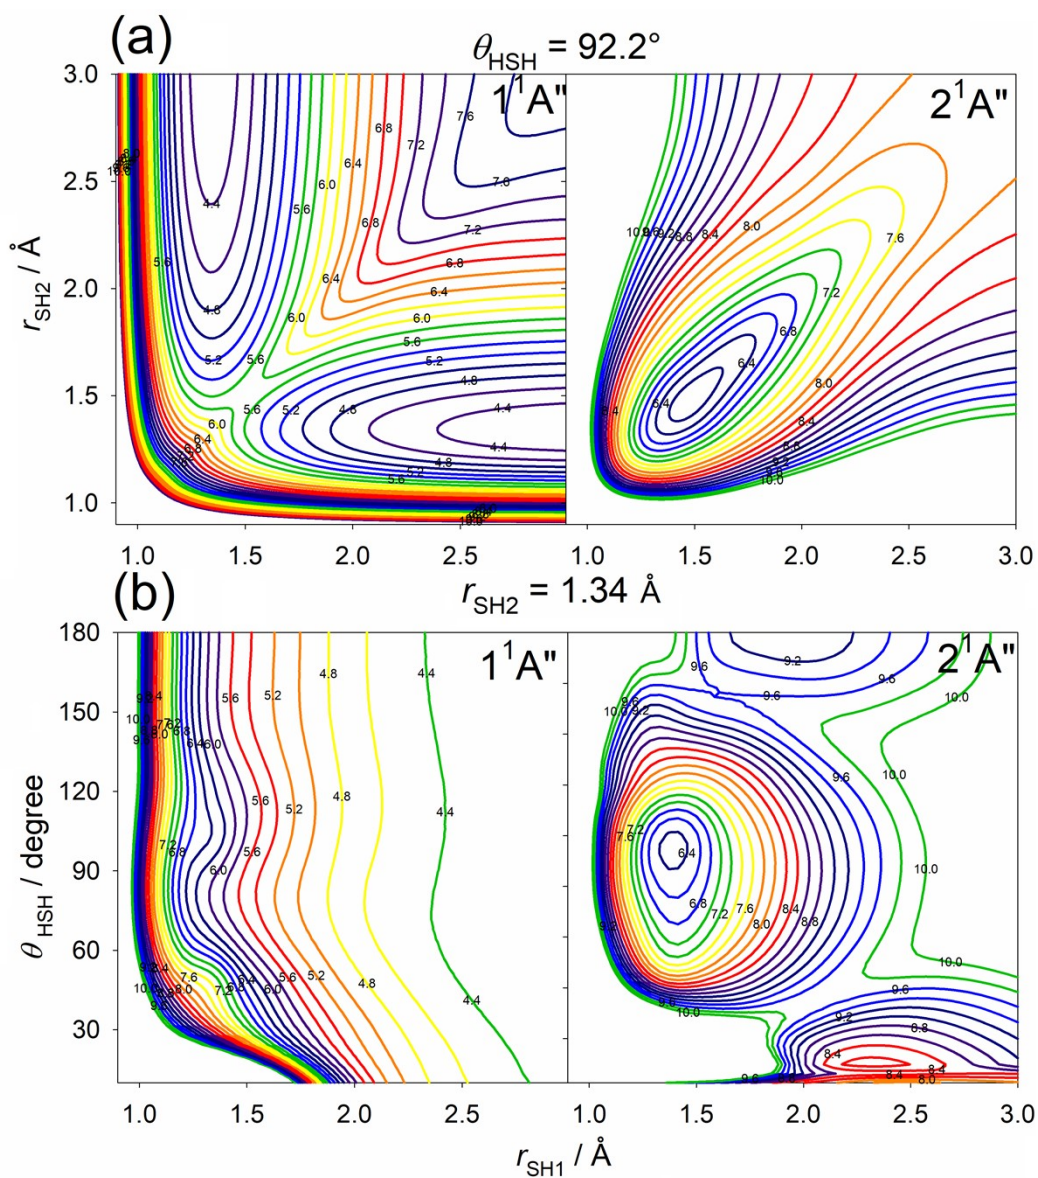

Fig. S3 Adiabatic PESs for the  $1^1A''$  and the  $2^1A''$  PESs: (a) as a function of  $r_{SH1}$  and  $r_{SH2}$ , with bond angle fixed at  $\theta_{HSH}=92.2^\circ$ . (b) PESs as a function of  $r_{SH1}$  and  $\theta_{HSH}$ , with the other SH bond fixed at 1.34 Å. The contour intervals are 0.2 eV for all panels.

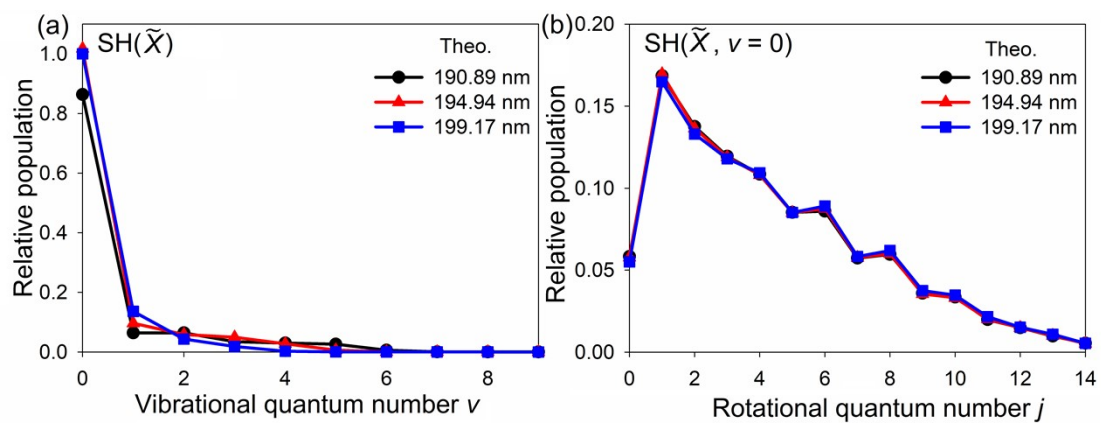

Fig. S4 (a) Theoretical SH( $\tilde{X}$ ) vibrational distributions at three peak energies of the absorption spectrum. (b) Theoretical SH( $\tilde{X}, \nu=0$ ) rotational distributions at three peak energies of the absorption spectrum.

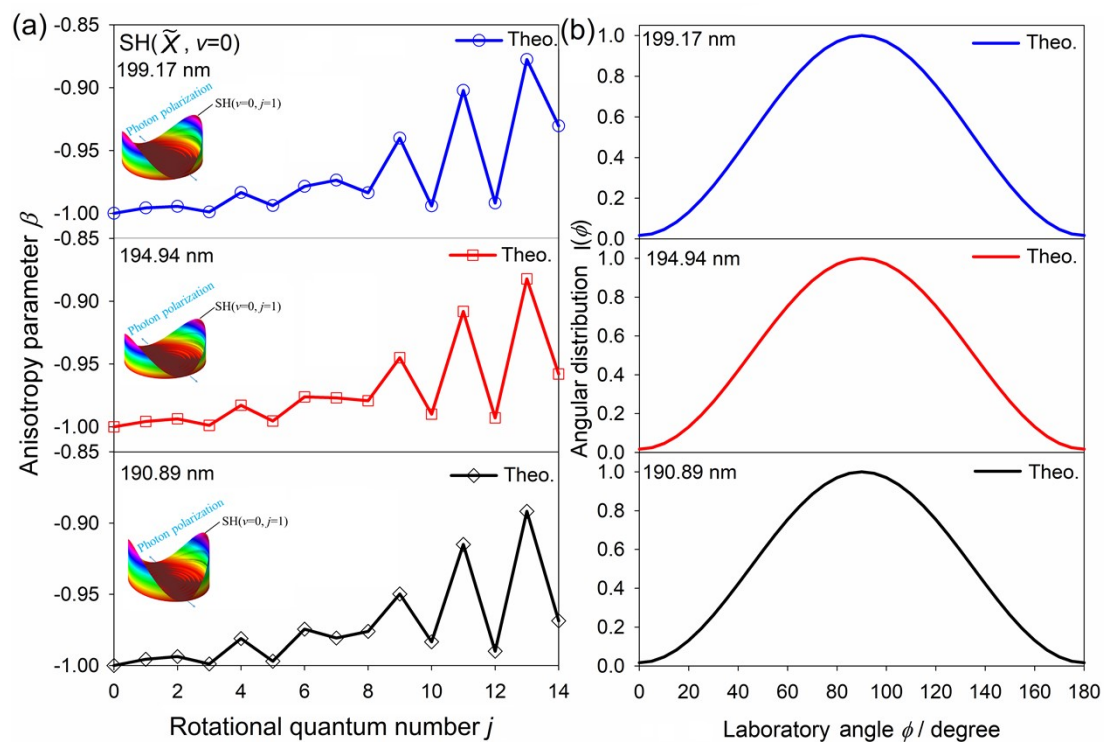

Fig. S5 (a) Calculated rotational state resolved anisotropy parameters  $\beta$  for SH( $\tilde{X}$ ,  $v=0$ ) products at three peak energies of the absorption spectrum, and (b) angular distributions of recoiling H atom as a function of laboratory angle at three peak energies of the absorption spectrum. The inset shows calculated DCSs for SH( $\tilde{X}$ ) fragments at corresponding energy.
